# Supplementary material for: Anthocyanin-based intelligent food packaging films reinforced with ginger pseudostem cellulose fibers: a sustainable approach for real-time freshness monitoring of perishable foods
Source: Royal Society of Chemistry journal article supplement (doi:10.1039/d6ra03420a), 2026-06-04
Supplement: d6ra03420a1.pdf [file d6ra03420a1.pdf]

**Supplementary Information for**

**Anthocyanin-Based Intelligent Food Packaging Films Reinforced with  
Ginger Pseudostem Cellulose Fibers: A Sustainable Approach for Real-  
Time Freshness Monitoring of Perishable Foods**

*Nguyen Chi Thanh, <sup>\*‡a</sup> Pham Nguyen Hong Nhu, <sup>‡a</sup> Nguyen Quoc Dat,<sup>a</sup> Bui Phuong Dong,<sup>a</sup>  
Nguyen Thanh Huy,<sup>bc</sup> Nguyen Bui Anh Duy,<sup>bc</sup> Nguyen Tue Anh<sup>d</sup>*

<sup>a</sup> Faculty of Applied Sciences, Ho Chi Minh City University of Technology and Engineering, 01 Vo Van Ngan Street, Thu Duc Ward, Ho Chi Minh City, Vietnam.

<sup>b</sup> Department of Polymer Materials, Faculty of Materials Technology, Ho Chi Minh City University of Technology (HCMUT), 268 Ly Thuong Kiet Street, Dien Hong Ward, Ho Chi Minh City, Vietnam.

<sup>c</sup> Vietnam National University Ho Chi Minh City, Linh Xuan Ward, Ho Chi Minh City, Vietnam.

<sup>d</sup> School of Science, Engineering & Technology, RMIT Saigon South, 702 Nguyen Van Linh Boulevard, Tan Hung Ward, Ho Chi Minh City, Vietnam.

<sup>‡</sup> These authors contributed equally to this work.

<sup>\*</sup> Corresponding author.

E-mail addresses: Nguyen Chi Thanh - [thanhnc@hcmute.edu.vn](mailto:thanhnc@hcmute.edu.vn)

**Table S1.** Investigation of ethanol concentration for anthocyanin extraction.

| No. | Ethanol concentration* (%) | Solid-to-solvent ratio (w/v) | Ultrasonication time (min) |
|-----|----------------------------|------------------------------|----------------------------|
| 1   | 20                         | 1:25                         | 15                         |
| 2   | 40                         | 1:25                         | 15                         |
| 3   | 60                         | 1:25                         | 15                         |
| 4   | 80                         | 1:25                         | 15                         |

\* The ethanol concentration was investigated to determine the optimal conditions for anthocyanin extraction. Other parameters, such as the solid-to-solvent ratio and ultrasonication time, were kept constant.

**Table S2.** Investigation of the solid-to-solvent ratio in anthocyanin extraction.

| No. | Ethanol concentration (%) | Solid-to-solvent ratio* (w/v) | Ultrasonication time (min) |
|-----|---------------------------|-------------------------------|----------------------------|
| 1   | 60                        | 1:15                          | 15                         |
| 2   | 60                        | 1:20                          | 15                         |
| 3   | 60                        | 1:25                          | 15                         |
| 4   | 60                        | 1:30                          | 15                         |

\* The solid-to-solvent ratio was investigated to determine the optimal conditions for anthocyanin extraction. Other parameters, such as ethanol concentration and ultrasonic treatment time, were kept constant.

**Table S3.** Investigation of the anthocyanin extraction time

| No. | Ethanol concentration (%) | Solid-to-solvent ratio (w/v) | Ultrasonication time* (min) |
|-----|---------------------------|------------------------------|-----------------------------|
| 1   | 60                        | 1:25                         | 5                           |
| 2   | 60                        | 1:25                         | 15                          |
| 3   | 60                        | 1:25                         | 30                          |
| 4   | 60                        | 1:25                         | 45                          |

\* Ultrasonication time was investigated to determine the optimal conditions for anthocyanin extraction, while parameters such as ethanol concentration and solid-to-solvent ratio were kept constant.

**Table S4.** One-way ANOVA table of ethanol concentration on total anthocyanin content.

| Source         | Sum of Squares | Df | Mean Square | F-Ratio | P-Value          |
|----------------|----------------|----|-------------|---------|------------------|
| Between groups | 0.425          | 3  | 0.142       | 207.385 | 6.4              |
| Within groups  | 0.005          | 8  | 0.001       |         | $\times 10^{-8}$ |
| Total          | 0.430          | 11 |             |         |                  |

At  $p < 0.05$ , the mean values are significantly different.

**Table S5.** One-way ANOVA table of the material-to-solvent ratio on total anthocyanin content.

| Source         | Sum of Squares | Df | Mean Square | F-Ratio | P-Value |
|----------------|----------------|----|-------------|---------|---------|
| Between groups | 0.019          | 3  | 0.006       | 15.686  | 0.001   |
| Within groups  | 0.003          | 8  | 0.0004      |         |         |
| Total          | 0.022          | 11 |             |         |         |

At  $p < 0.05$ , the mean values are significantly different.

**Table S6.** One-way ANOVA table of ultrasound time on total anthocyanin content.

| Source         | Sum of Squares | Df | Mean Square | F-Ratio | P-Value |
|----------------|----------------|----|-------------|---------|---------|
| Between groups | 0.087          | 3  | 0.029       | 28.904  | 0.0001  |
| Within groups  | 0.008          | 8  | 0.001       |         |         |
| Total          | 0.095          | 11 |             |         |         |

At  $p < 0.05$ , the mean values are significantly different.

**Table S7.** One-way ANOVA table for the tensile strength of PVA and PA films.

| Source         | Sum of Squares | Df | Mean Square | F-Ratio | P-Value |
|----------------|----------------|----|-------------|---------|---------|
| Between groups | 126.954        | 1  | 126.954     | 13.104  | 0.022   |
| Within groups  | 38.753         | 4  | 9.688       |         |         |
| Total          | 165.707        | 5  |             |         |         |

At  $p < 0.05$ , the mean values are significantly different.

**Table S8.** One-way ANOVA table for the tensile strength of PA film and PA film reinforced with different cellulose fiber contents.

| Source         | Sum of Squares | Df | Mean Square | F-Ratio | P-Value |
|----------------|----------------|----|-------------|---------|---------|
| Between groups | 24.976         | 3  | 8.325       | 0.779   | 0.538   |
| Within groups  | 85.472         | 8  | 10.684      |         |         |
| Total          | 110.448        | 11 |             |         |         |

At  $p > 0.05$ , the mean values are not significantly different.

**Table S9.** One-way ANOVA table for the elongation at break of PVA and PA film.

| Source         | Sum of Squares | Df | Mean Square | F-Ratio | P-Value                |
|----------------|----------------|----|-------------|---------|------------------------|
| Between groups | 11742.765      | 1  | 11742.765   | 96.291  | $6.046 \times 10^{-4}$ |
| Within groups  | 487.803        | 4  | 121.951     |         |                        |
| Total          | 12230.567      | 5  |             |         |                        |

At  $p < 0.05$ , the mean values are significantly different.

**Table S10.** One-way ANOVA table for the elongation at break of PA film and PA film reinforced with different cellulose fiber contents.

| Source         | Sum of Squares | Df | Mean Square | F-Ratio | P-Value |
|----------------|----------------|----|-------------|---------|---------|
| Between groups | 5126.041       | 3  | 1708.680    | 4.349   | 0.043   |
| Within groups  | 3143.206       | 8  | 392.901     |         |         |
| Total          | 8269.246       | 11 |             |         |         |

At  $p < 0.05$ , the mean values are significantly different.

**Table S11.** One-way ANOVA table for the Young's modulus of PVA and PA films.

| Source         | Sum of Squares | Df | Mean Square | F-Ratio | P-Value |
|----------------|----------------|----|-------------|---------|---------|
| Between groups | 78.567         | 1  | 78.567      | 0.250   | 0.643   |
| Within groups  | 1258.084       | 4  | 314.521     |         |         |
| Total          | 1336.651       | 5  |             |         |         |

At  $p > 0.05$ , the mean values are not significantly different.

**Table S12.** One-way ANOVA table for the Young's modulus of PA film and PA film reinforced with different cellulose fiber contents.

| Source         | Sum of Squares | Df | Mean Square | F-Ratio | P-Value |
|----------------|----------------|----|-------------|---------|---------|
| Between groups | 118.315        | 3  | 39.438      | 0.367   | 0.779   |
| Within groups  | 860.497        | 8  | 107.562     |         |         |
| Total          | 978.812        | 11 |             |         |         |

At  $p > 0.05$ , the mean values are not significantly different.

**Dynamic light scattering (DLS) analysis.** The average diameter distribution of cellulose fibers dispersed in aqueous suspension was determined by dynamic light scattering technique using a Malvern Panalytical Zetasizer Pro instrument. Prior to analysis, the samples were diluted to a concentration of approximately 0.1 wt% with deionized (DI) water and ultrasonicated for 30 min to improve the dispersion of the cellulose fibers.

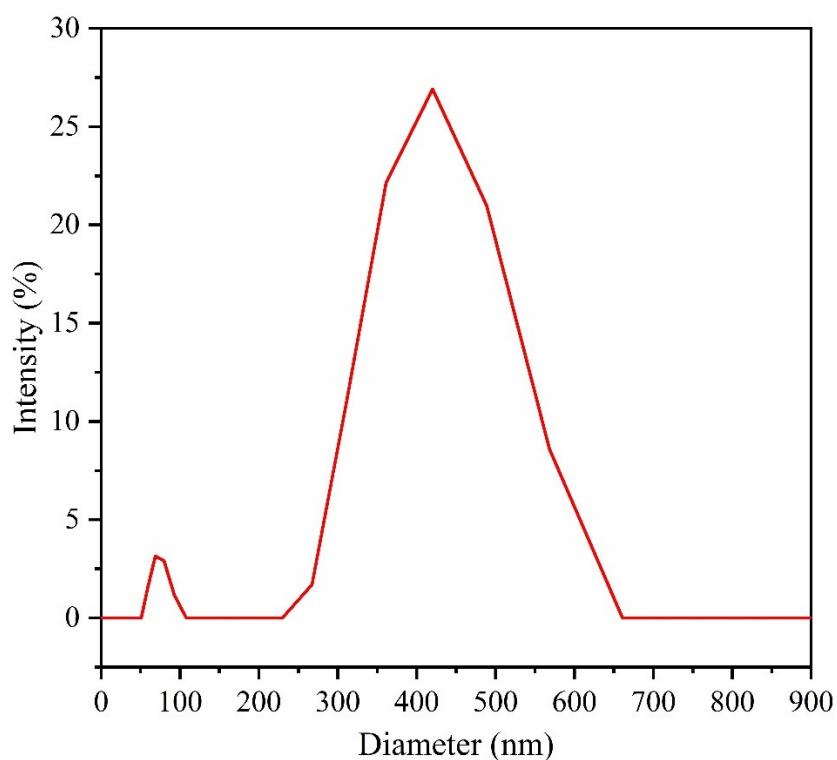

**Figure S1.** Cellulose fibers diameter distribution determined by DLS analysis.
